# Sex-related differences in the clinical diagnosis of frontotemporal dementia

Vicent Llorca-Bofi<sup>1</sup>, Ignacio Illán-Gala<sup>2</sup>, Rafael Blesa<sup>2</sup>

<sup>1</sup>Autonomous University of Barcelona, Spain

<sup>2</sup>Memory Unit, Department of Neurology, Hospital de la Santa Creu i Sant Pau, Biomedical Research Institute Sant Pau, Universitat Autònoma de Barcelona, Barcelona, Spain

## **Disclaimer text:**

The authors have withdrawn this manuscript because some authors did not consent with its publication and the data are too preliminary to be disseminated. Therefore, the authors do not wish this work to be cited as reference for the project. If you have any questions, please contact the corresponding author.
